# Supplementary material for: Vaccine escape, increased breakthrough and reinfection in infliximab-treated patients with IBD during the Omicron wave of the SARS-CoV-2 pandemic
Source: HighWire-hosted journal article supplement (doi:10.1136/gutjnl-2022-327570), 2022-07-28
Supplement: gutjnl-2022-327570supp001_data_supplement.pdf [file gutjnl-2022-327570supp001_data_supplement.pdf]

# Supplementary Information for ‘Vaccine escape, increased breakthrough and reinfections in infliximab-treated patients with IBD during the Omicron wave of the SARS-CoV-2 pandemic.’

## Table of Contents

|                                                                                                                                              |    |
|----------------------------------------------------------------------------------------------------------------------------------------------|----|
| Supplementary Table 1: Contributors to the CLARITY IBD study .....                                                                           | 2  |
| Supplementary Table 2: Univariable factors associated with time to breakthrough infection.....                                               | 25 |
| Supplementary Figure 1: Antibody concentrations following a third vaccine dose in patients with a prior history of SARS-CoV-2 infection..... | 26 |
| Supplementary Figure 2: Multivariable factors associated with hospitalisation with COVID-19 .....                                            | 27 |

Supplementary Table 1: Contributors to the CLARITY IBD study

| <b>Affiliation</b>                                                                  | <b>First name</b> | <b>Surname</b> |
|-------------------------------------------------------------------------------------|-------------------|----------------|
| Barts Health NHS Trust                                                              | Klaartje          | Kok            |
|                                                                                     | Nick              | Croft          |
|                                                                                     | Bessie            | Cipriano       |
|                                                                                     | Caroline          | Francia        |
|                                                                                     | Nosheen           | Khalid         |
|                                                                                     | Ashley            | Kingston       |
|                                                                                     | Irish             | Lee            |
|                                                                                     | Anouk             | Lehmann        |
|                                                                                     | Kinnari           | Naik           |
|                                                                                     | Kevin             | Samuels        |
|                                                                                     | Nicolene          | Plaatjies      |
|                                                                                     | Hafiza            | Khatun         |
|                                                                                     | Farjana           | Bokth          |
|                                                                                     | Elise             | Pabriaga       |
| Madiha                                                                              | Islam             |                |
| Basingstoke and North Hampshire Hospital                                            | Rebecca           | Saich          |
|                                                                                     | Hayley            | Cousins        |
|                                                                                     | Wendy             | Fraser         |
|                                                                                     | Rachel            | Thomas         |
|                                                                                     | Matthew           | Brown          |
|                                                                                     | Benjamin          | White          |
| Basingstoke and North Hampshire Hospital (Hampshire Hospitals NHS Foundation Trust) | Nikolaos          | Kirkineziadis  |
|                                                                                     | Bernadette        | Tilley         |
|                                                                                     | Pennie            | Porter         |
|                                                                                     | Rachel            | Bryant         |
|                                                                                     | Natalia           | Robaczewska    |
| Birmingham Women's and Children's NHS Foundation Trust                              | Rafeeq            | Muhammed       |
|                                                                                     | Rehana            | Bi             |

|                                                     |             |           |
|-----------------------------------------------------|-------------|-----------|
|                                                     | Catherine   | Cotter    |
|                                                     | Jayne       | Grove     |
|                                                     | Kate        | Hong      |
|                                                     | Ruth        | Howman    |
|                                                     | Monica      | Mitchell  |
|                                                     | Sophie      | Clayton   |
|                                                     | Louise      | Rogers    |
|                                                     | Sugrah      | Sultan    |
|                                                     | Melanie     | Rooney    |
|                                                     | Charlotte   | Cottrill  |
| Bolton NHS Foundation Trust                         | Salil       | Singh     |
|                                                     | Chris       | Dawe      |
|                                                     | Robert      | Hull      |
|                                                     | Natalie     | Silva     |
|                                                     | Julie       | Chadwick  |
|                                                     | Laura       | Robertson |
| Borders General Hospital                            | Jonathan    | Manning   |
|                                                     | Lauren      | Finlayson |
|                                                     | Allison     | Roebuck   |
|                                                     | Joy         | Dawson    |
| Calderdale and Huddersfield NHS Foundation Trust    | Sunil       | Sonwalkar |
|                                                     | Naomi       | Chambers  |
|                                                     | Matthew     | Robinson  |
|                                                     | Andrew      | Haigh     |
|                                                     | Lear        | Matapure  |
| Cambridge University Hospitals NHS Foundation Trust | Tim         | Raine     |
|                                                     | Varun       | George    |
|                                                     | Christina   | Kapizioni |
|                                                     | Konstantina | Strongili |
|                                                     | Tina        | Thompson  |

|                                                                                                                                |            |            |
|--------------------------------------------------------------------------------------------------------------------------------|------------|------------|
|                                                                                                                                | Mohamed    | Ahmed      |
|                                                                                                                                | Christos   | Kontos     |
|                                                                                                                                | Claire     | Dawson     |
| Cambridge Institute of Therapeutic Immunology and Infectious Disease, Jeffrey Cheah Biomedical Centre, University of Cambridge | Christophe | Bourges    |
|                                                                                                                                | Isabella   | Barbutti   |
|                                                                                                                                | Megan E    | Gozzard    |
| Chelsea and Westminster Hospital NHS Foundation Trust                                                                          | Philip     | Hendy      |
|                                                                                                                                | Rhian      | Bull       |
|                                                                                                                                | Patricia   | Costa      |
|                                                                                                                                | Lisa       | Davey      |
|                                                                                                                                | Hayley     | Hannington |
|                                                                                                                                | Kribashnie | Nundlall   |
|                                                                                                                                | Catarina   | Martins    |
|                                                                                                                                | Laura      | Avanzi     |
|                                                                                                                                | Jaime      | Carungcong |
|                                                                                                                                | Sabrina    | Barr       |
|                                                                                                                                | Richard    | Appleby    |
|                                                                                                                                | Emma       | Johnson    |
|                                                                                                                                | Eathar     | Shakweh    |
| Chesterfield Royal Hospital                                                                                                    | Kath       | Phillis    |
|                                                                                                                                | Rachel     | Gascoyne   |
|                                                                                                                                | Amanda     | Crowder    |
|                                                                                                                                | Amanda     | Whileman   |
| Countess Of Chester Hospital NHS Foundation Trust                                                                              | Ian        | London     |
|                                                                                                                                | Jenny      | Grounds    |
|                                                                                                                                | Emmeline   | Martin     |
|                                                                                                                                | Susie      | Pajak      |
|                                                                                                                                | Jude       | Price      |
|                                                                                                                                | Kathryn    | Cawley     |
|                                                                                                                                | Sandra     | Powell     |

|                                                         |           |           |
|---------------------------------------------------------|-----------|-----------|
|                                                         | Nichola   | Kearsley  |
| Darlington Memorial Hospital                            | Anjan     | Dhar      |
|                                                         | Ellen     | Brown     |
|                                                         | Amanda    | Cowton    |
|                                                         | Kimberley | Stamp     |
| Dartford and Gravesham NHS Trust                        | Ben       | Warner    |
|                                                         | Carmel    | Stuart    |
|                                                         | Louise    | Lacey     |
| The Dudley Group NHS Foundation Trust                   | Shanika   | de Silva  |
|                                                         | Clare     | Allcock   |
|                                                         | Philip    | Harvey    |
|                                                         | Lesley    | Jones     |
|                                                         | Elise     | Cooke     |
|                                                         | Jayne     | Slater    |
|                                                         | Dominic   | King      |
| East and North Hertfordshire NHS Trust                  | Johanne   | Brooks    |
|                                                         | Pearl     | Baker     |
|                                                         | Hannah    | Beadle    |
|                                                         | Carina    | Cruz      |
|                                                         | Debbie    | Potter    |
| East Lancashire Hospitals NHS Trust                     | Joe       | Collum    |
|                                                         | Farzana   | Masters   |
| Glangwili Hospital<br>Hywel Dda University Health Board | Aashish   | Kumar     |
|                                                         | Samantha  | Coetzee   |
|                                                         | Mihaela   | Peiu      |
|                                                         | Becky     | Icke      |
|                                                         | Jill      | Williams  |
|                                                         | Meena     | Raj       |
| Great Ormond Street Hospital                            | Edward    | Gaynor    |
|                                                         | Sibongile | Chadokufa |

|                                              |              |                 |
|----------------------------------------------|--------------|-----------------|
|                                              | Bonita       | Huggett         |
|                                              | Hamza        | Meghari         |
|                                              | Sara         | El-Khouly       |
|                                              | Fevronia     | Kiparissi       |
|                                              | Waffa        | Girshab         |
|                                              | Lynda        | Russell-Walker  |
|                                              | Christopher  | Jackson         |
|                                              | Sara         | Sidler          |
| Great Western Hospitals NHS Foundation Trust | Andrew       | Claridge        |
|                                              | Emily        | Fowler          |
|                                              | Laura        | McCafferty      |
|                                              | Lesley       | Haxton          |
| Guy's and St Thomas' NHS Foundation Trust    | Peter        | Irving          |
|                                              | Karolina     | Christodoulides |
|                                              | Angela       | Clifford        |
|                                              | Patrick      | Dawson          |
|                                              | Sailish      | Honap           |
|                                              | Samuel       | Lim             |
|                                              | Raphael      | Luber           |
|                                              | Karina       | Mahiouz         |
|                                              | Susanna      | Meade           |
|                                              | Parizade     | Raymode         |
|                                              | Rebecca      | Reynolds        |
|                                              | Anna         | Stanton         |
|                                              | Sherill      | Tripoli         |
|                                              | Naomi        | Hare            |
|                                              | Sopuluchukwu | Odukwe          |
|                                              | Senthuran    | Balachandran    |
|                                              | Emma         | North           |

|                                               |                  |                 |
|-----------------------------------------------|------------------|-----------------|
|                                               | Jessica          | North           |
|                                               | Bria             | Browne          |
|                                               | Jessica          | Cordle          |
|                                               | Ella             | Jameson         |
| The Hillingdon Hospitals NHS Foundation Trust | Yih Harn         | Siaw            |
|                                               | Lane             | Manzano         |
|                                               | Jonathan         | Segal           |
|                                               | Ibrahim          | Al-Bakir        |
|                                               | Imran            | Khakoo          |
|                                               | Sofiya           | Portukhay       |
| Homerton University Hospital Foundation Trust | Nora             | Thoua           |
|                                               | Katherine        | Davidson        |
|                                               | Jagrul           | Miah            |
|                                               | Lisa             | Canclini        |
|                                               | Alex             | Hall            |
|                                               | Hassina          | Furreed         |
|                                               | Christine        | Mitchell-Inwang |
| Hull University Teaching Hospitals NHS Trust  | Shaji            | Sebastian       |
|                                               | Melony           | Hayes           |
|                                               | Sally            | Myers           |
|                                               | Alison           | Talbot          |
|                                               | Jack             | Turnbull        |
|                                               | Emma             | Whitehead       |
|                                               | Katie            | Stamp           |
|                                               | Alison           | Pattinson       |
|                                               | Verghese         | Mathew          |
|                                               | Leanne           | Sherris         |
|                                               | Julie            | Wilcox          |
|                                               | Sankaranarayanan | Ramachandran    |
|                                               | Hayley           | Robertson       |

|                                                       |                 |              |
|-------------------------------------------------------|-----------------|--------------|
|                                                       | Angela          | Harvey       |
| Imperial College Healthcare NHS Trust                 | Lucy            | Hicks        |
|                                                       | Tara-Marie      | Byrne        |
|                                                       | Leilani         | Cabreros     |
|                                                       | Hannah          | Downing-Wood |
|                                                       | Sophie          | Hunter       |
|                                                       | Mohammad Aamir  | Saifuddin    |
|                                                       | Hemanth         | Prabhudev    |
|                                                       | Sharmili        | Balarajah    |
|                                                       | Jan             | Krucznski    |
|                                                       | Kalliopi        | Driva        |
|                                                       | Andrea          | D'Mello      |
|                                                       | Parith          | Shah         |
| Faculty of Medicine, Imperial College London          | Hajir           | Ibraheim     |
|                                                       | Melissa         | Torkizadeh   |
|                                                       | Jonathan W      | Lo           |
|                                                       | Zhigang         | Liu          |
| James Paget University Hospitals NHS Foundation Trust | Helen           | Sutherland   |
|                                                       | Elva            | Wilhelmsen   |
|                                                       | Katherine       | Mackintosh   |
| Kettering General Hospital                            | Ajay M          | Verma        |
|                                                       | Juliemol        | Sebastian    |
|                                                       | Mohammad Farhad | Peerally     |
|                                                       | Parizade        | Raymode      |
|                                                       | Anne-marie      | Guerdette    |
|                                                       | Susan           | Coburn       |
|                                                       | Ching Yee       | Novem lam    |
|                                                       | Donna           | Durrant      |
|                                                       | Belinda         | Schaefer     |
|                                                       | Solange         | Serna        |



|                                                           |           |             |
|-----------------------------------------------------------|-----------|-------------|
|                                                           | Muhammad  | Shahzad     |
| King's College Hospital NHS Foundation Trust              | Alexandra | Kent        |
|                                                           | Lee Meng  | Choong      |
|                                                           | Benedetta | Pantaloni   |
|                                                           | Pantelis  | Ravdas      |
| King's College Hospital NHS Foundation Trust (paediatric) | Babu      | Vadamalayan |
| King's Mill Hospital                                      | Stephen   | Foley       |
|                                                           | Becky     | Arnold      |
|                                                           | Cheryl    | Heeley      |
|                                                           | Wayne     | Lovegrove   |
|                                                           | Donna     | Sowton      |
|                                                           | Lynne     | Allsop      |
|                                                           | Heidi     | Gregory     |
|                                                           | Mandy     | Gill        |
|                                                           | Megan     | Holmes      |
|                                                           | Valeria   | Balan       |
|                                                           | Susan     | Smith       |
|                                                           | Sarah     | Turner      |
| Liverpool University Hospitals NHS Foundation Trust       | Philip J  | Smith       |
|                                                           | Alan      | Steel       |
|                                                           | Giovanna  | Bretland    |
|                                                           | Sarah     | King        |
|                                                           | Martina   | Lofthouse   |
|                                                           | Lindsey   | Rigby       |
|                                                           | Sreedhar  | Subramanian |
|                                                           | David     | Tyrer       |
|                                                           | Kate      | Martin      |
| Christopher                                               | Probert   |             |
| London North West University                              | Nikolaos  | Kamperidis  |

|                                            |            |             |
|--------------------------------------------|------------|-------------|
| Healthcare NHS Trust                       | Temí       | Adedoyin    |
|                                            | Manisha    | Baden       |
|                                            | Jeannette  | Brown       |
|                                            | Feba       | Chacko      |
|                                            | Lisa       | Young       |
|                                            | Michela    | Cicchetti   |
|                                            | Mohammad   | Saifuddin   |
|                                            | Priya      | Yesupatham  |
| Maidstone and Tunbridge Wells NHS Trust    | Rohit      | Gowda       |
|                                            | Maureen    | Williams    |
| Manchester University NHS Foundation Trust | Karen      | Kemp        |
|                                            | Rima       | Akhand      |
|                                            | Glaxy      | Gray        |
|                                            | Anu        | John        |
|                                            | Maya       | John        |
|                                            | Tasnim     | Mohammed    |
|                                            | Diamond    | Sathe       |
|                                            | Natasha    | Jones       |
|                                            | Jennifer   | Soren       |
| The Mid Yorkshire Hospitals NHS Trust      | Michael    | Sprakes     |
|                                            | Julie      | Burton      |
|                                            | Patricia   | Kane        |
|                                            | Stephanie  | Lupton      |
|                                            | Jacqueline | Bartholomew |
|                                            | Elizabeth  | Denis       |
|                                            | Alison     | Daniels     |
| Milton Keynes University Hospital          | George     | MacFaul     |
|                                            | Diane      | Scaletta    |
|                                            | Loria      | Siamia      |
|                                            | Felicity   | Williams    |

|                                                               |                                     |                |
|---------------------------------------------------------------|-------------------------------------|----------------|
|                                                               | Chloe                               | Green          |
|                                                               | Zeljka                              | Ver            |
| Newcastle Hospitals NHS Foundation Trust                      | Chris                               | Lamb           |
|                                                               | Mary                                | Doona          |
|                                                               | Ashleigh                            | Hogg           |
|                                                               | Lesley                              | Jeffrey        |
|                                                               | Andrew                              | King           |
|                                                               | R Alexander                         | Speight        |
|                                                               | Jennifer                            | Doyle          |
|                                                               | Ruth                                | Owen           |
|                                                               | Jenny                               | Haworth        |
|                                                               | Linda                               | Patterson      |
|                                                               | Vithusa                             | Varnaulasingam |
|                                                               | Ninewells Hospital & Medical School | Craig          |
| Debbie                                                        |                                     | Rice           |
| Susan                                                         |                                     | MacFarlane     |
| Anne                                                          |                                     | MacLeod        |
| Samera                                                        |                                     | Mohammed       |
| Ninewells Hospital & Medical                                  | Shona                               | Murray         |
|                                                               | Anne                                | Elliott        |
| Norfolk and Norwich University Hospitals NHS Foundation Trust | Mary                                | Anne Morris    |
|                                                               | Louise                              | Coke           |
|                                                               | Grace                               | Hindle         |
|                                                               | Eirini                              | Kolokouri      |
|                                                               | Catherine                           | Wright         |
|                                                               | Claire                              | Lee            |
|                                                               | Nicola                              | Ward           |
|                                                               | Adele                               | Dann           |
| North Bristol NHS Trust                                       | Melanie                             | Lockett        |
|                                                               | Charlotte                           | Cranfield      |

|                                              |           |            |
|----------------------------------------------|-----------|------------|
|                                              | Louise    | Jennings   |
|                                              | Ankur     | Srivastava |
|                                              | Lana      | Ward       |
|                                              | Nouf      | Jeynes     |
|                                              | Poonam    | Ranga      |
| North Tyneside General Hospital              | Praveen   | Rajasekhar |
|                                              | Lisa      | Gallagher  |
|                                              | Linda     | Patterson  |
|                                              | Jill      | Ward       |
|                                              | Rae       | Basnett    |
|                                              | Judy      | Murphy     |
|                                              | Lauren    | Parking    |
|                                              | Emma      | Lawson     |
|                                              | Stacey    | Short      |
| Nottingham University Hospitals<br>NHS Trust | David     | Devadason  |
|                                              | Gordon    | Moran      |
|                                              | Neelam    | Khan       |
|                                              | Lauren    | Tarr       |
|                                              | Charmaine | Olivia     |
|                                              | Samantha  | Warbarton  |
|                                              | Sian      | Kelly      |
| The Pennine Acute Hospitals NHS<br>Trust     | Jimmy     | Limdi      |
|                                              | Kay       | Goulden    |
|                                              | Asad      | Javed      |
|                                              | Lauren    | McKenzie   |
|                                              | Julie     | Melville   |
|                                              | Eleanor   | Liu        |
|                                              | Joseph    | Sabine     |
|                                              | Patricia  | Jacob      |
|                                              | Denise    | McSorland  |

|                                                   |           |               |
|---------------------------------------------------|-----------|---------------|
|                                                   | Nick      | Schofield     |
|                                                   | Lisa      | Cornwall      |
|                                                   | James     | Quirke        |
|                                                   | Emma      | Crook         |
|                                                   | Anne      | Turner        |
| Portsmouth Hospitals NHS Trust                    | Pradeep   | Bhandari      |
|                                                   | Michelle  | Baker-Moffatt |
|                                                   | Joanne    | Dash          |
|                                                   | Alison    | Le Poidevin   |
|                                                   | Hayley    | Downe         |
|                                                   | Lucille   | Bombero       |
|                                                   | Helen     | Blackman      |
|                                                   | Rebecca   | Smith         |
| The Queen Elizabeth Hospital Kings Lynn NHS Trust | Alan      | Wiles         |
|                                                   | Hannah    | Bloxham       |
|                                                   | Jose      | Dias          |
|                                                   | Evelyn    | Nadar         |
|                                                   | Hollie    | Curgenvin     |
|                                                   | Ellie     | Gilham        |
| Queen Elizabeth University Hospital, Glasgow      | Jonathan  | Macdonald     |
|                                                   | Shona     | Finan         |
|                                                   | Faye      | McMeeken      |
|                                                   | Misbah    | Mahmood       |
|                                                   | Stephanie | Shields       |
|                                                   | John Paul | Seenan        |
| Royal Berkshire NHS Foundation Trust              | Des       | DeSilva       |
|                                                   | Susanna   | Malkakorpi    |
|                                                   | Rachel    | Carson        |
|                                                   | Holly     | Lawrence      |
|                                                   | Ofori     | Boateng       |

|                                                  |           |                |
|--------------------------------------------------|-----------|----------------|
|                                                  | Felix     | Kpodo          |
| University Hospitals Dorset NHS Foundation Trust | Simon     | Whiteoak       |
|                                                  | Kelli     | Edger-Earley   |
|                                                  | Luke      | Vamplew        |
|                                                  | Joanna    | Samways        |
|                                                  | Sue       | Roffe          |
| Royal Cornwall Hospitals NHS Trust               | Sarah     | Ingram         |
|                                                  | Joel      | James          |
|                                                  | Sharon    | Botfield       |
|                                                  | Fiona     | Hammonds       |
|                                                  | Clare     | James          |
|                                                  | Zoe       | Berry          |
| Royal Devon and Exeter NHS Foundation Trust      | Tariq     | Ahmad          |
|                                                  | Gemma     | Aspinall       |
|                                                  | Sarah     | Hawkins        |
|                                                  | Marian    | Parkinson      |
|                                                  | Helen     | Gardner-Thorpe |
|                                                  | Suzie     | Marriott       |
|                                                  | Clare     | Redstone       |
|                                                  | Halina    | Windak         |
|                                                  | Ana-Marie | Adam           |
|                                                  | Hannah    | Mabb           |
|                                                  | Emma      | Stevenson      |
| Jessica                                          | Record    |                |
| Royal Free London NHS Foundation Trust           | Charles   | Murray         |
|                                                  | Cynthia   | Diaba          |
|                                                  | Fexy      | Joseph         |
|                                                  | Glykeria  | Pakou          |
|                                                  | Yvonne    | Gleeson        |
|                                                  | Annalyn   | Nunag          |

|                                                                                  |             |               |
|----------------------------------------------------------------------------------|-------------|---------------|
| Royal Glamorgan Hospital                                                         | James       | Berrill       |
|                                                                                  | Natalie     | Stroud        |
|                                                                                  | Carla       | Pothecary     |
|                                                                                  | Lisa        | Roche         |
|                                                                                  | Keri        | Turner        |
|                                                                                  | Lisa        | Deering       |
|                                                                                  | Lynda       | Israel        |
| Royal Gwent Hospital                                                             | Evelyn      | Baker         |
|                                                                                  | Maxine      | Nash          |
| Royal Hampshire County Hospital<br>(Hampshire Hospitals NHS<br>Foundation Trust) | John        | Gordon        |
|                                                                                  | Emma        | Levell        |
|                                                                                  | Silvia      | Zagalo        |
|                                                                                  | Wendy       | Fraser        |
|                                                                                  | Ina         | Hoad          |
|                                                                                  | Nikolaos    | Kirkineziadis |
|                                                                                  | Bernadette  | Tilley        |
|                                                                                  | Natalia     | Robaczewska   |
|                                                                                  | Bindu       | Anil          |
| Royal Hospital for Sick Children,<br>Edinburgh                                   | Richard     | Russell       |
|                                                                                  | Paul        | Henderson     |
|                                                                                  | Margaret    | Millar        |
| Royal Manchester Children's<br>Hospital                                          | Andrew      | Fagbemi       |
|                                                                                  | Felicia     | Jennings      |
|                                                                                  | Imelda      | Mayor         |
|                                                                                  | Jill        | Wilson        |
|                                                                                  | Alice       | Wheeler       |
|                                                                                  | Nicola      | Phillips      |
| Royal Surrey County Hospital                                                     | Christopher | Alexakis      |
|                                                                                  | Natalia     | Michalak      |
|                                                                                  | Cheryl      | Marriott      |

|                                    |           |             |
|------------------------------------|-----------|-------------|
|                                    | Sarah     | Stone       |
|                                    | Veronika  | Pristopan   |
| Royal United Hospitals Bath        | John      | Saunders    |
|                                    | Helen     | Burton      |
|                                    | Vanessa   | Cambridge   |
|                                    | Tonia     | Clark       |
|                                    | Charlotte | Ekblad      |
|                                    | Sarah     | Hierons     |
|                                    | Joyce     | Katebe      |
|                                    | Emma      | Saunbury    |
|                                    | Rachel    | Perry       |
| The Royal Wolverhampton NHS Trust  | Matthew   | Brookes     |
|                                    | Kathryn   | Davies      |
|                                    | Marie     | Green       |
|                                    | Ann       | Plumbe      |
| Salford Royal NHS Foundation Trust | Clare     | Ormerod     |
|                                    | Helen     | Christensen |
|                                    | Hannah    | Howlett     |
|                                    | Anne      | Keen        |
|                                    | Jonathan  | Ogor        |
|                                    | Marie     | Greenhaigh  |
|                                    | Karen     | Knowles     |
|                                    | Shanzi    | Yin         |
|                                    | Maria     | Poulaka     |
| Salisbury District Hospital        | Alpha     | Anthony     |
|                                    | Emily     | Newitt      |
|                                    | Fiona     | Trim        |
|                                    | Ruth      | Casey       |
|                                    | Katherine | Seymour     |
|                                    | Catherine | Reed        |



|                                                           | Lijo      | Joy         |
|-----------------------------------------------------------|-----------|-------------|
| Sandwell and West Birmingham NHS Trust                    | Edward    | Fogden      |
|                                                           | Kalisha   | Russell     |
|                                                           | Samia     | Hussain     |
| Sheffield Teaching Hospitals NHS Foundation Trust         | Anne      | Phillips    |
|                                                           | Muaad     | Abdulla     |
| Shrewsbury and Telford Hospital NHS Trust                 | Jeff      | Butterworth |
|                                                           | Colene    | Adams       |
|                                                           | Mandy     | Carnahan    |
|                                                           | Elizabeth | Buckingham  |
|                                                           | Danielle  | Childs      |
|                                                           | Alison    | Magness     |
|                                                           | Jo        | Stickley    |
|                                                           | Nichola   | Motherwell  |
|                                                           | Louise    | Tonks       |
|                                                           | Hannah    | Gibson      |
|                                                           | Susie     | Pajak       |
|                                                           | Kate      | Wistance    |
| Singleton Hospital<br>Swansea Bay University Health Board | Caradog   | Thomas      |
|                                                           | Elaine    | Brinkworth  |
|                                                           | Lynda     | Connor      |
|                                                           | Amanda    | Cook        |
|                                                           | Tabitha   | Rees        |
|                                                           | Rachel    | Harford     |
|                                                           | Sean      | Farley      |
| Somerset NHS Foundation Trust                             | Marie     | Jones       |
|                                                           | Emma      | Wesley      |
|                                                           | Alison    | Moss        |
|                                                           | Jacob     | Lucas       |
|                                                           | Claire    | Lorimer     |

|                                                       |           |            |
|-------------------------------------------------------|-----------|------------|
|                                                       | Maria     | Oleary     |
|                                                       | Maxine    | Dixon      |
|                                                       | Fiona     | Goodchild  |
|                                                       | Rebecca   | Twenlow    |
|                                                       | Corinne   | Pawley     |
| South Tees Hospitals NHS Foundation Trust             | Arvind    | Ramadas    |
|                                                       | Julie     | Tregonning |
|                                                       | Olaku     | Okeke      |
|                                                       | Wendy     | Jackson    |
| Southend University Hospital NHS Foundation Trust     | Ioannis   | Koumoutsos |
|                                                       | Viji      | George     |
|                                                       | Swapna    | Kunhunni   |
|                                                       | Sophie    | Laverick   |
|                                                       | Isla      | Anderson   |
|                                                       | Sophie    | Smith      |
|                                                       | Joan      | Joyce      |
|                                                       | Sarala    | Janarthan  |
| St George's University Hospitals NHS Foundation Trust | Kamal     | Patel      |
|                                                       | Mariam    | Ali        |
|                                                       | Hilda     | Mhandu     |
|                                                       | Aleem     | Rana       |
|                                                       | Katherine | Spears     |
|                                                       | Joana     | Teixeira   |
|                                                       | Richard   | Pollok     |
|                                                       | Mark      | Mencias    |
|                                                       | Abigail   | Seaward    |
|                                                       | Jessica   | Sousa      |
|                                                       | Nooria    | Said       |
|                                                       | Mark      | Soomaroo   |
|                                                       | Valentina | Raspa      |

|                                                                        |             |               |
|------------------------------------------------------------------------|-------------|---------------|
|                                                                        | Asha        | Tacouri       |
| St George's University Hospitals NHS Foundation Trust (paediatric)     | Nicholas    | Reps          |
|                                                                        | Rebecca     | Martin        |
|                                                                        | Tinashe     | Samakomva     |
| St James's University Hospital (The Leeds Teaching Hospital NHS Trust) | Christian   | Selinger      |
|                                                                        | Jenelyn     | Carbonell     |
|                                                                        | Felicia     | Onovira       |
|                                                                        | Doris       | Quartey       |
|                                                                        | Alice       | L'Anson       |
|                                                                        | Andrew      | Ashworth      |
|                                                                        | Jessica     | Bailey        |
|                                                                        | Angie       | Dunn          |
|                                                                        | Gjuzel      | Bespaloj      |
|                                                                        | Harold      | Rasalan       |
| Stockport NHS Foundation Trust                                         | Zahid       | Mahmood       |
|                                                                        | Racheal     | Campbell      |
|                                                                        | Liane       | Marsh         |
|                                                                        | Tricia      | Coughlan      |
|                                                                        | Wisam       | Jafar         |
|                                                                        | Janet       | Marrs         |
|                                                                        | Christopher | McPheat       |
| Surrey and Sussex Healthcare NHS Trust                                 | Monira      | Rahman        |
|                                                                        | Sarah       | Davies        |
|                                                                        | Ruth        | Habibi        |
|                                                                        | Ellen       | Jessup-Dunton |
|                                                                        | Teishel     | Joefield      |
|                                                                        | Reina       | Layug         |
| Tameside and Glossop Integrated Care NHS Foundation Trust              | Vinod       | Patel         |
|                                                                        | Joanne      | Vere          |
|                                                                        | Victoria    | Turner        |

|                                                               |            |               |
|---------------------------------------------------------------|------------|---------------|
|                                                               | Susan      | Kilroy        |
|                                                               | Martina    | Coulding      |
|                                                               | Martyn     | Clark         |
|                                                               | Jacqueline | McCormick     |
|                                                               | Attiya     | Nisar         |
| Torbay and South Devon NHS Foundation Trust                   | Gareth     | Walker        |
|                                                               | Stacey     | Atkins        |
|                                                               | Jasmine    | Growdon       |
|                                                               | Becky      | George        |
|                                                               | Charlotte  | McNeill       |
|                                                               | Bryony     | Reed          |
|                                                               | Angela     | Foulds        |
|                                                               | Catherine  | Marshall      |
|                                                               | Michele    | Allison       |
|                                                               | Briony     | Dillon        |
| University Hospitals Birmingham NHS Foundation Trust          | Rachel     | Cooney        |
|                                                               | Lillie     | Bennett       |
|                                                               | Louise     | Bowlas        |
|                                                               | Sharafaath | Shariff       |
| University Hospitals Bristol NHS Foundation Trust             | Aileen     | Fraser        |
|                                                               | Dwayne     | Punnette      |
|                                                               | Rebecca    | Lambert       |
|                                                               | Charlotte  | Bishop-Hurman |
|                                                               | Elizabeth  | Undrell       |
|                                                               | Katherine  | Belfield      |
| University Hospitals of Derby and Burton NHS Foundation Trust | Said       | Din           |
|                                                               | Catherine  | Addleton      |
|                                                               | Marie      | Appleby       |
|                                                               | Johanna    | Brown         |
|                                                               | Kathleen   | Holding       |

|                                             |           |              |
|---------------------------------------------|-----------|--------------|
|                                             | Catherine | Fraser       |
|                                             | Janice    | Birkenshaw   |
|                                             | Jodie     | Williams     |
|                                             | Kamille   | Maulion      |
|                                             | Meg       | Lane         |
|                                             | Arita     | Kravale      |
|                                             | Claud     | Smith        |
| University Hospitals of Leicester NHS Trust | Patricia  | Hooper       |
|                                             | John      | deCaestecker |
|                                             | Olivia    | Watchorn     |
|                                             | Ellie     | Clarke       |
| University Hospitals Plymouth NHS Trust     | Chris     | Hayward      |
|                                             | Susan     | Inniss       |
|                                             | Lucy      | Pritchard    |
|                                             | Karen     | Rudge        |
|                                             | Amanda    | Carney       |
|                                             | Sarah     | Griffee      |
| United Lincolnshire Hospitals NHS Trust     | Jervoise  | Andreyev     |
|                                             | Sathish   | Babu         |
|                                             | Caroline  | Hayhurst     |
|                                             | Carol     | Lockwood     |
|                                             | Lynn      | Osborne      |
|                                             | Amanda    | Roper        |
|                                             | Karen     | Warner       |
|                                             | Julia     | Hindle       |
|                                             | Tara      | Lawrence     |
|                                             | Kimberley | Netherton    |
|                                             | Caroline  | Watt         |
|                                             | Kinga     | Szymiczek    |
| University College London Hospitals         | Shameer   | Mehta        |

|                                                                 |           |                  |
|-----------------------------------------------------------------|-----------|------------------|
| NHS Foundation Trust                                            | James     | Bell             |
|                                                                 | William   | Blad             |
|                                                                 | Lisa      | Whitley          |
|                                                                 | Roman     | Jastrub          |
| University Hospital Llandough                                   | Dhamaraj  | Durai            |
|                                                                 | Mark      | Baker            |
|                                                                 | Elizabeth | John Sivamurugan |
|                                                                 | Mim       | Evans            |
| University Hospital Southampton<br>NHS Foundation Trust         | Fraser    | Cummings         |
|                                                                 | Clare     | Harris           |
|                                                                 | Amy       | Jones            |
|                                                                 | Liga      | Krauze           |
|                                                                 | Sohail    | Rahmany          |
|                                                                 | Michelle  | Earl             |
|                                                                 | Jenny     | Vowles           |
|                                                                 | Audrey    | Torokwa          |
|                                                                 | Mirela    | Petrova          |
|                                                                 | Andrew    | Procter          |
|                                                                 | Jo        | Stanley          |
|                                                                 | Claudia   | Silvamoniz       |
|                                                                 | Marion    | Betty            |
| University Hospital of Wales<br>(paediatric)                    | Amar      | Wahid            |
|                                                                 | Zoe       | Morrison         |
|                                                                 | Rhian     | Thomas-Turner    |
|                                                                 | Louise    | Yendle           |
|                                                                 | Jennifer  | Muller           |
| Exeter NIHR Clinical Research<br>Facility, University of Exeter | Marcus    | Mitchell         |
|                                                                 | John      | Kirkwood         |
|                                                                 | Anna      | Barnes           |
| West Hertfordshire Hospitals NHS                                | Rakesh    | Chaudhary        |

|                                                                                                  |              |             |
|--------------------------------------------------------------------------------------------------|--------------|-------------|
| Trust                                                                                            | Melanie      | Claridge    |
|                                                                                                  | Chiara       | Ellis       |
|                                                                                                  | Cheryl       | Kemp        |
|                                                                                                  | Ogwa         | Tobi        |
|                                                                                                  | Jentus       | Milton      |
| West Middlesex University Hospital<br>(Chelsea and Westminster NHS<br>Hospital Foundation Trust) | Emma         | Johnston    |
|                                                                                                  | Metod        | Oblak       |
|                                                                                                  | Richard      | Appleby     |
|                                                                                                  | Carmen       | Winpenny    |
|                                                                                                  | Marie-Louise | Svensson    |
| West Suffolk NHS Foundation Trust                                                                | Jo           | Godden      |
|                                                                                                  | Marium       | Ashhar      |
| Western General Hospital                                                                         | Charlie      | Lees        |
|                                                                                                  | Debbie       | Alexander   |
|                                                                                                  | Kate         | Covil       |
|                                                                                                  | Lauranne     | Derikx      |
|                                                                                                  | Sryros       | Siakavellas |
|                                                                                                  | Helen        | Baxter      |
|                                                                                                  | Scott        | Robertson   |
|                                                                                                  | Linda        | Smith       |
|                                                                                                  | Beena        | Poulose     |
|                                                                                                  | Anne         | Colemam     |
|                                                                                                  | Margareta    | Balint      |
|                                                                                                  | Gareth       | Rhys-Jones  |
|                                                                                                  | Helen        | Watters     |
|                                                                                                  | Susan        | Begg        |
|                                                                                                  | Beatriz      | Grosalcalde |
| Judy                                                                                             | Coyle        |             |
| Withybush General Hospital                                                                       | Kerrie       | Johns       |
|                                                                                                  | Rachel       | Hughes      |

|                                               |           |                |
|-----------------------------------------------|-----------|----------------|
|                                               | Janet     | Phipps         |
|                                               | Abigail   | Taylor         |
|                                               | Catherine | MacPhee        |
|                                               | Suzanne   | Brooks         |
|                                               | Jolene    | John           |
|                                               | Michelle  | Edwards        |
| Yeovil District Hospital NHS Foundation Trust | Katie     | Smith          |
|                                               | Linda     | Howard         |
|                                               | Dianne    | Wood           |
| York Teaching Hospital NHS Foundation Trust   | Ajay      | Muddu          |
|                                               | Laura     | Barman         |
|                                               | Janine    | Mallinson      |
|                                               | Tania     | Neale          |
|                                               | Diana     | Ionita         |
|                                               | Kerry     | Elliot         |
|                                               | Alison    | Turnball       |
| Ysbyty Gwynedd                                | Iola      | Thomas         |
|                                               | Alice     | Thomas         |
|                                               | Kelly     | Andrews        |
|                                               | Jonathon  | Sutton         |
|                                               | Caroline  | Mulvaney Jones |
|                                               | Julia     | Roberts        |
|                                               | Jeannie   | Bishop         |



## Supplementary Table 2: Univariable factors associated with time to breakthrough infection

| Variable                                                                 | Level           | Hazard ratio (95% CI) | p       |
|--------------------------------------------------------------------------|-----------------|-----------------------|---------|
| Infliximab (vs vedolizumab)                                              | TRUE            | 1.83 (1.44 - 2.33)    | <0.0001 |
| Thiopurine                                                               | TRUE            | 1.52 (1.24 - 1.85)    | <0.0001 |
| Methotrexate                                                             | TRUE            | 0.77 (0.50 - 1.20)    | 0.25    |
| Vaccine                                                                  | BNT162b2        | Reference             |         |
|                                                                          | ChAdOx1 nCoV-19 | 0.89 (0.73 - 1.09)    | 0.26    |
| Steroids                                                                 | TRUE            | 0.52 (0.30 - 0.90)    | 0.021   |
| Age >= 60                                                                | TRUE            | 0.26 (0.18 - 0.38)    | <0.0001 |
| Crohn's disease (vs UC or IBDU)                                          | TRUE            | 0.98 (0.81 - 1.22)    | 0.96    |
| Non-white ethnicity                                                      | TRUE            | 1.19 (0.83 - 1.69)    | 0.34    |
| Current smoker                                                           | TRUE            | 0.90 (0.62 - 1.29)    | 0.55    |
| Anti-spike (S) receptor binding domain antibody concentrations (overall) |                 | 0.98 (0.82 - 1.18)    | 0.85    |

Abbreviations: UC = ulcerative colitis, IBDU = IBD unclassified

Supplementary Figure 1: Antibody concentrations following a third vaccine dose in patients with a prior history of SARS-CoV-2 infection.

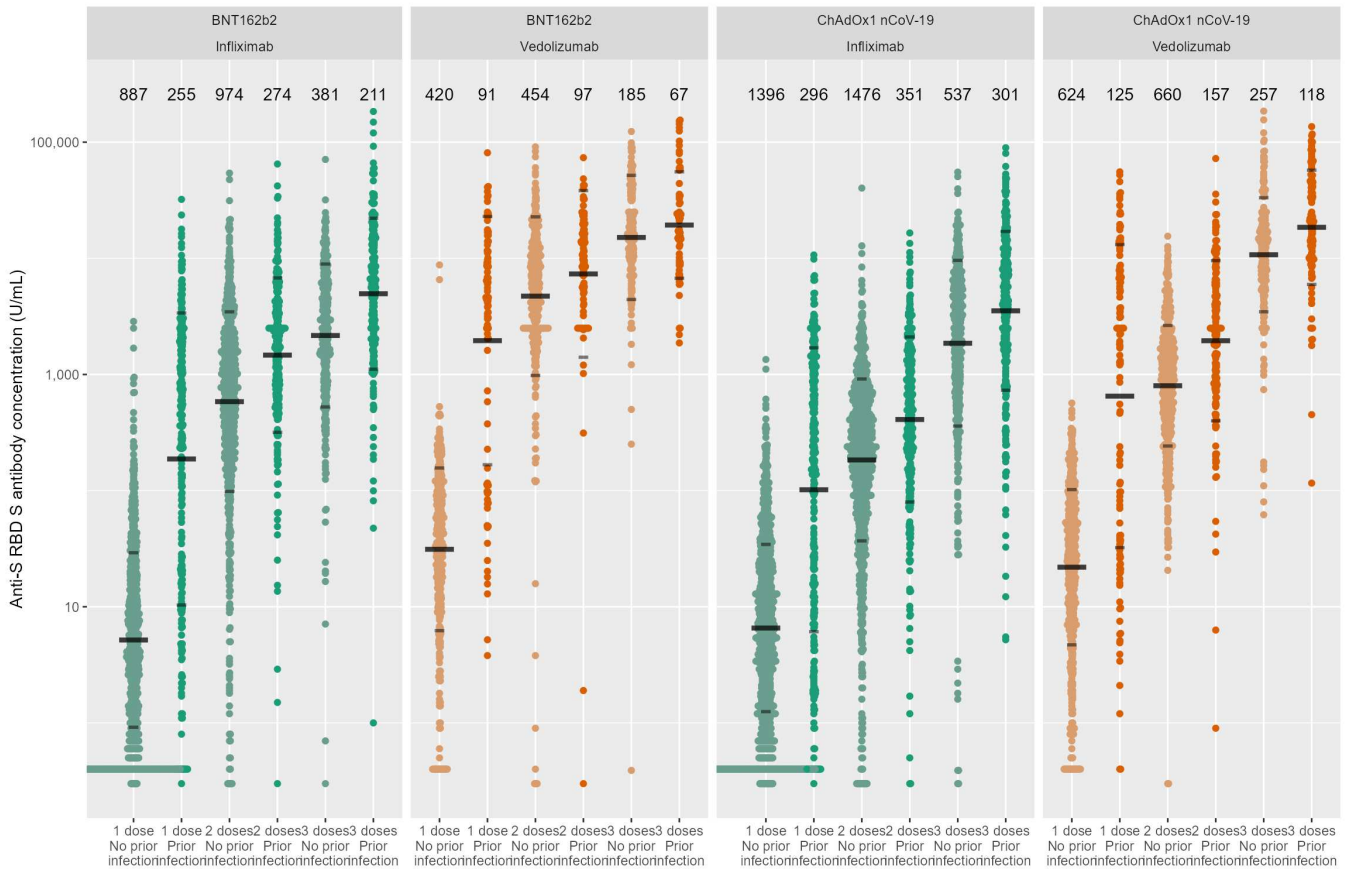

## Supplementary Figure 2: Multivariable factors associated with hospitalisation with COVID-19

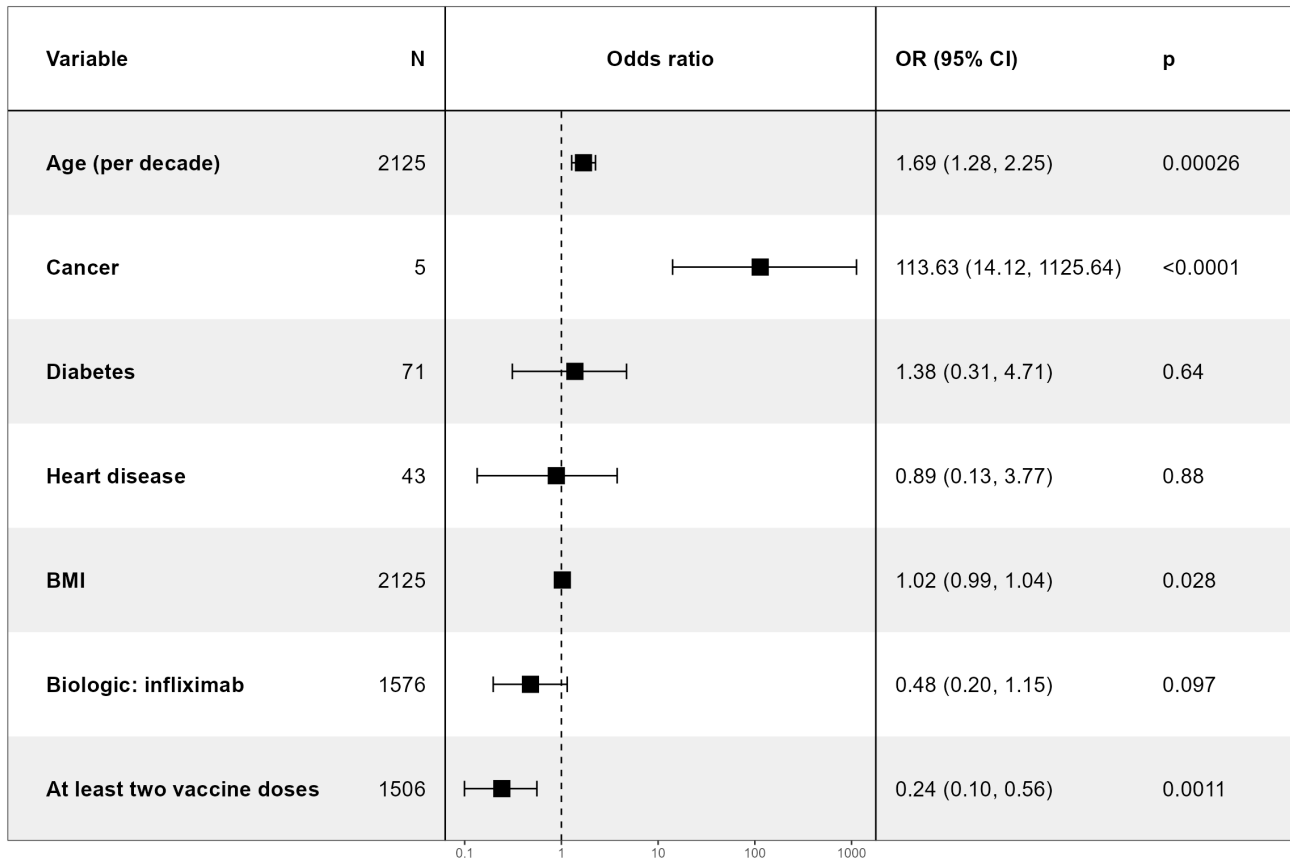

Abbreviations: BMI = body mass index, CI = confidence interval
